# Supplementary material
Source: Royal Society of Chemistry journal article supplement (doi:10.1039/d6ma00153j)
Supplement: d6ma00153j1.pdf [file d6ma00153j1.pdf]

**Synthesis of a novel visible light-driven and magnetically separable photocatalyst based  
on BiFeO<sub>3</sub>-YFeO<sub>3</sub> type II heterojunction**

**Sofia M. Tikhanova**<sup>1</sup>, **Mikhail P. Volkov**<sup>2</sup>, **Ivan V. Buryanenko**<sup>3</sup>, **Valentin G. Semenov**<sup>3,4</sup>, **Zhandos Orazov**<sup>5</sup>, **Valentin Romanovski**<sup>6,\*</sup>, **Vadim I. Popkov**<sup>1</sup>, **Natalia A. Lomanova**<sup>7,\*</sup>

<sup>1</sup> Hydrogen Energy Laboratory, Ioffe Institute, St. Petersburg 194021, Russia

<sup>2</sup> Laboratory of Kinetic Phenomena in Solids at Low Temperatures, Ioffe Institute, St. Petersburg 194021, Russia

<sup>3</sup> RITVERC JSC, St. Petersburg 194223, Russia

<sup>4</sup> Mössbauer Spectroscopy Laboratory, Institute for Analytical Instrumentation of RAS, St. Petersburg 198095, Russia

<sup>5</sup> Center of Physical Chemical Methods of Research and Analysis, Al-Farabi Kazakh National University, Almaty 050040, Kazakhstan

<sup>6</sup> Department of Materials Science and Engineering, University of Virginia, Charlottesville 22904, USA

<sup>7</sup> Laboratory of New Inorganic Materials, Ioffe Institute, St. Petersburg 194021, Russia

\* Corresponding author e-mail:

Valentin Romanovski: [rvd9ar@virginia.edu](mailto:rvd9ar@virginia.edu)

Natalia A. Lomanova: [natus@mail.ioffe.ru](mailto:natus@mail.ioffe.ru)

**Table S1.** Nominal and experimental chemical composition, crystallite and grain sizes of BFO-YFO samples

| Sample  | $x^*(Y)$ | Key element ratio, Bi:Y:Fe*** | Iron excess, $\delta_{Fe}$ *** | Crystallite size, $d$ , nm | Grain size**, $\mu m$ |
|---------|----------|-------------------------------|--------------------------------|----------------------------|-----------------------|
| BFO     | 0.0      | 1.00:0.00:1.00                | 0.00                           | 87                         | 1.0                   |
| BYFO-01 | 0.1      | 0.91:0.09:1.02                | 0.02                           | 25                         | 0.30                  |
| BYFO-03 | 0.3      | 0.60:0.39:1.41                | 0.42                           | 27                         | 0.23                  |
| BYFO-04 | 0.4      | 0.43:0.57:1.53                | 0.53                           | 50                         | 0.20                  |
| BYFO-05 | 0.5      | 0.29:0.7:1.77                 | 0.79                           | 64                         | 0.35                  |
| BYFO-06 | 0.6      | 0.21:0.59:1.51                | 0.89                           | 46                         | 0.67                  |
| BYFO-07 | 0.7      | 0.26:0.64:1.61                | 0.79                           | 67                         | 0.8                   |
| BYFO-09 | 0.9      | 0.08:0.92:1.29                | 0.29                           | 49                         | 1.3                   |
| YFO     | 1.0      | 0.00:1.00:1.00                | 0.00                           | 71                         | 2.1                   |

Note: \* - nominal value of x, \*\* - grain size was determined from SEM images. \*\*\* - key element ratio and iron excess were determined from EDXS results

**Table S2.** Magnetic and photocatalytic characteristics of the BFO-YFO samples

| Sample  | Iron excess, $\delta_{Fe}$ *** | Magnetization $M$ , emu/g (at 4 kOe) | Remnant magnetization, $M_r$ , emu/g | Coercivity $H_c$ , kOe |
|---------|--------------------------------|--------------------------------------|--------------------------------------|------------------------|
| BFO     | 0.00                           | 0.07                                 | 0.02                                 | 0.70                   |
| BYFO-01 | 0.02                           | 0.47                                 | 0.06                                 | 0.17                   |
| BYFO-03 | 0.42                           | 0.33                                 | 0.15                                 | 0.28                   |
| BYFO-04 | 0.53                           | 2.40                                 | 0.92                                 | 0.39                   |
| BYFO-05 | 0.79                           | 8.10                                 | 2.60                                 | 0.36                   |
| BYFO-06 | 0.89                           | 8.20                                 | 3.20                                 | 0.40                   |
| BYFO-07 | 0.79                           | 7.80                                 | 2.80                                 | 0.40                   |
| BYFO-09 | 0.29                           | 2.60                                 | 1.00                                 | 0.37                   |
| YFO     | 0.00                           | 0.01                                 | 1.00                                 | 23.00                  |

Note: \* - iron excess was determined from EDXS results

**Table S3.**  $^{57}\text{Fe}$  Mössbauer spectral parameters of the main phases of the BFO-YFO samples

| Sample  | Spectral component | Isomer shift (mm/s) $\pm 0.02$ | Quadrupole splitting (mm/s) $\pm 0.03$ | Hyperfine field (T) $\pm 0.3$ | Area (%) $\pm 2$ | Phases [Ref.]                       |
|---------|--------------------|--------------------------------|----------------------------------------|-------------------------------|------------------|-------------------------------------|
| BFO     | <i>Sextet</i>      | 0.40                           | -0.12                                  | 49.5                          | 100              | $\text{BiFeO}_3$ [37][36]           |
| BYFO-05 | <i>Doublet1</i>    | 0.37                           | 1.80                                   | -                             | 3                | $\text{BiFeO}_3$ [37][36]           |
|         | <i>Doublet2</i>    | 0.33                           | 0.91                                   | -                             | 6                | non-magnetic iron                   |
|         | <i>Sextet1</i>     | 0.38                           | 0.18                                   | 51.6                          | 13               | $\alpha\text{-Fe}_2\text{O}_3$      |
|         | <i>Sextet2</i>     | 0.35                           | 0.00                                   | 49.9                          | 50               | $\text{YFeO}_3$ [35][38]            |
|         | <i>Sextet3</i>     | 0.33                           | 0.06                                   | 48.6                          | 21               | $\text{Fe}_3\text{O}_4$ (A)         |
|         | <i>Sextet4</i>     | 0.71                           | -0.09                                  | 46.3                          | 7                | $\text{Fe}_3\text{O}_4$ (B)         |
| BYFO-09 | <i>Doublet1</i>    | 0.32                           | 0.70                                   | -                             | 2                | $\text{BiFeO}_3$ [37][36]           |
|         | <i>Doublet2</i>    | 0.34                           | 1.18                                   | -                             | 9                | <i>am</i> - $\text{Fe}_2\text{O}_3$ |
|         | <i>Sextet1</i>     | 0.37                           | 0.23                                   | 51.6                          | 3                | $\alpha\text{-Fe}_2\text{O}_3$      |
|         | <i>Sextet2</i>     | 0.36                           | 0.01                                   | 50.0                          | 67               | $\text{YFeO}_3$ [35][38]            |
|         | <i>Sextet3</i>     | 0.34                           | 0.02                                   | 48.9                          | 14               | $\text{Fe}_3\text{O}_4$ (A)         |
|         | <i>Sextet4</i>     | 0.68                           | 0.00                                   | 45.8                          | 5                | $\text{Fe}_3\text{O}_4$ (B)         |
| YFO     | <i>Sextet</i>      | 0.36                           | 0.01                                   | 49.9                          | 100              | $\text{YFeO}_3$ [35][38]            |

**Table S4.** Theoretical and experimental parameters of the BFO-YFO samples' electronic structure

| Sample  | Phases                     | $E_g$ Theor | $E_g$ Calc | $x$  | CB   | VB   | Ref. $E_g$ | Ref. $x$ |
|---------|----------------------------|-------------|------------|------|------|------|------------|----------|
| BFO     | $\text{BiFeO}_3$           | 2.16        | 2.01       | 5.89 | 2.39 | 0.39 | [9][4]     | [6][14]  |
| BYFO-01 | $\text{BiFeO}_3$           | 2.16        | 2.02       | 5.89 | 2.40 | 0.38 | [9][4]     | [6][14]  |
| BYFO-03 | $\text{BiFeO}_3$           | 2.16        | 2.04       | 5.89 | 2.41 | 0.37 | [9][4]     | [6][14]  |
|         | <i>o</i> - $\text{YFeO}_3$ | 1.95        | 1.94       | 5.6  | 2.07 | 0.13 | [5][13]    | [7][15]  |
| BYFO-04 | $\text{BiFeO}_3$           | 2.16        | 2.04       | 5.89 | 2.41 | 0.37 | [9][4]     | [6][14]  |
|         | <i>o</i> - $\text{YFeO}_3$ | 1.95        | 1.91       | 5.6  | 2.05 | 0.15 | [5][13]    | [7][15]  |
| BYFO-05 | <i>o</i> - $\text{YFeO}_3$ | 1.95        | 1.91       | 5.6  | 2.06 | 0.14 | [5][13]    | [7][15]  |
| BYFO-06 | <i>o</i> - $\text{YFeO}_3$ | 1.95        | 1.84       | 5.6  | 2.02 | 0.18 | [5][13]    | [7][15]  |
| BYFO-07 | <i>o</i> - $\text{YFeO}_3$ | 1.95        | 1.85       | 5.6  | 2.02 | 0.18 | [5][13]    | [7][15]  |
| BYFO-09 | <i>o</i> - $\text{YFeO}_3$ | 1.95        | 1.86       | 5.6  | 2.03 | 0.17 | [5][13]    | [7][15]  |

|     |                             |      |      |     |      |      |         |         |
|-----|-----------------------------|------|------|-----|------|------|---------|---------|
| YFO | <i>o</i> -YFeO <sub>3</sub> | 1.95 | 1.94 | 5.6 | 2.07 | 0.13 | [5][13] | [7][15] |
|-----|-----------------------------|------|------|-----|------|------|---------|---------|

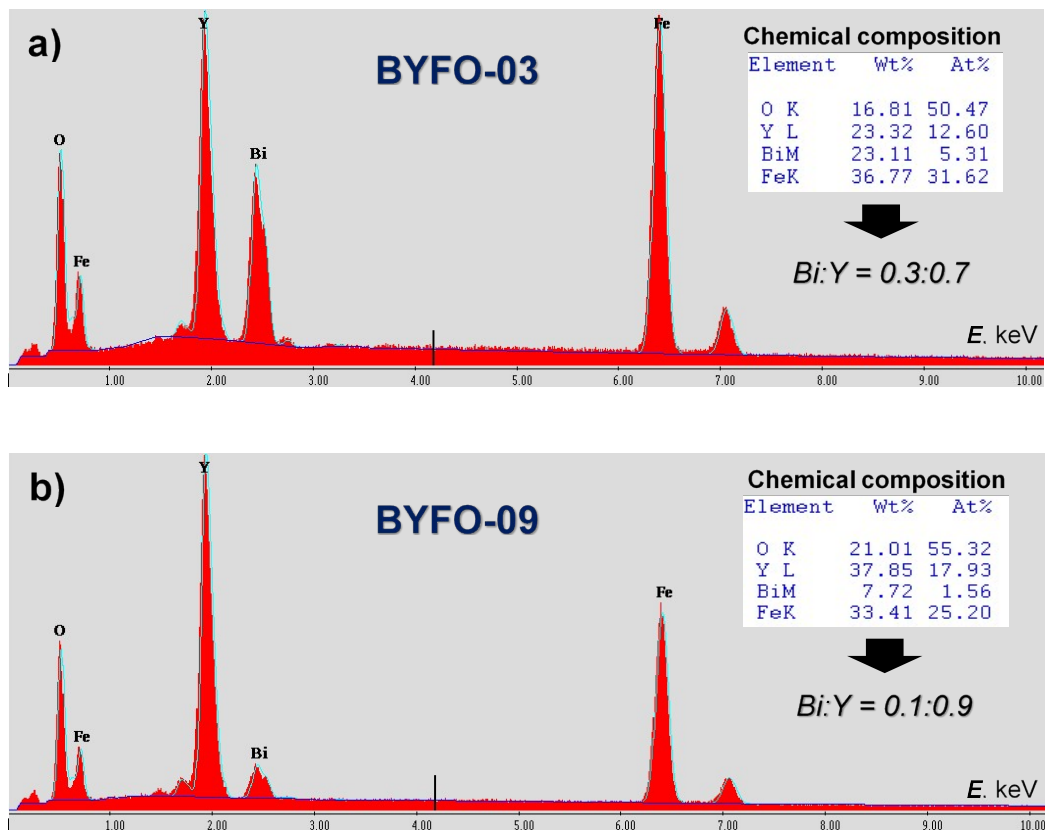

**Fig. S1.** EDX spectra of BYFO-03 (a) and BYFO-09 (b) samples.

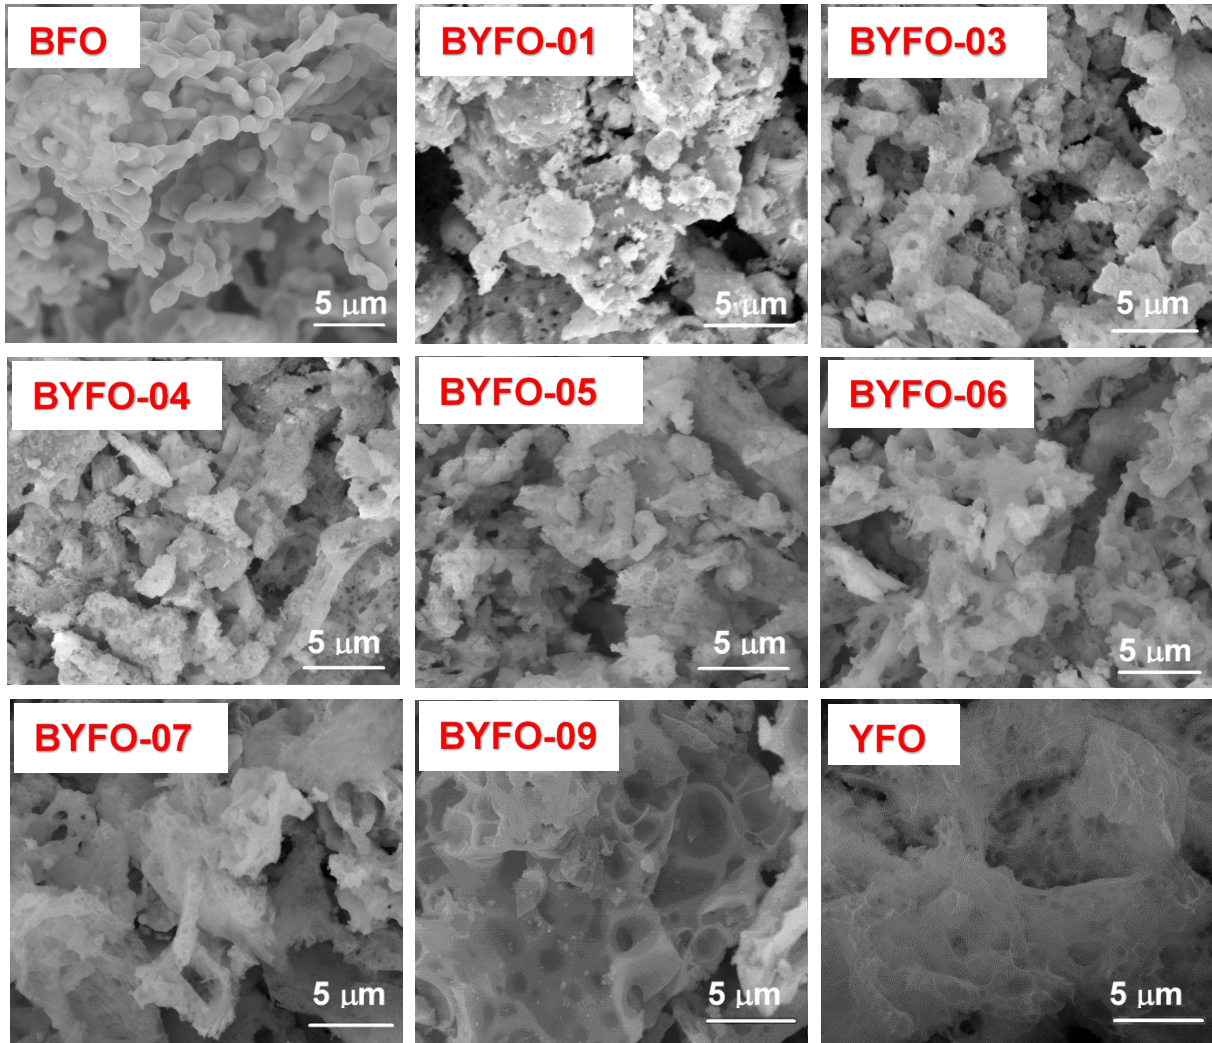

Fig. S2. SEM images of BFO, BYFO, and YFO samples.

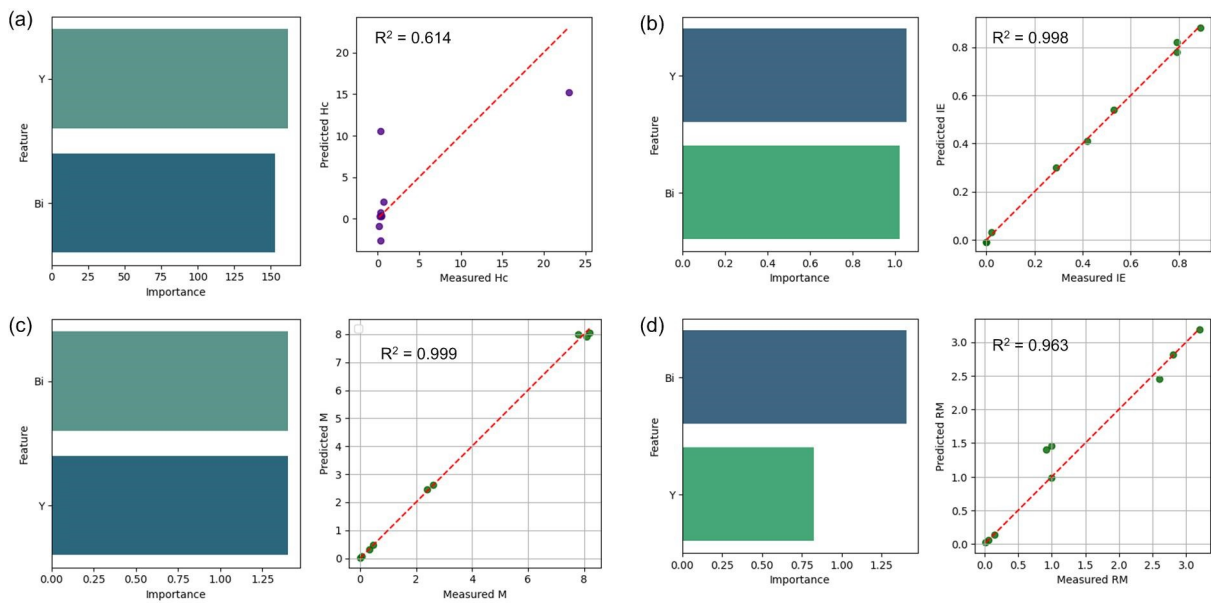

**Fig. S3.** Variable importance, and plots of predicted and measured values for Hc (a) - polynomial equation, IE (b) – SVR, M (c) – GPR, and RM (d) – SVR. Results for the best models are shown.

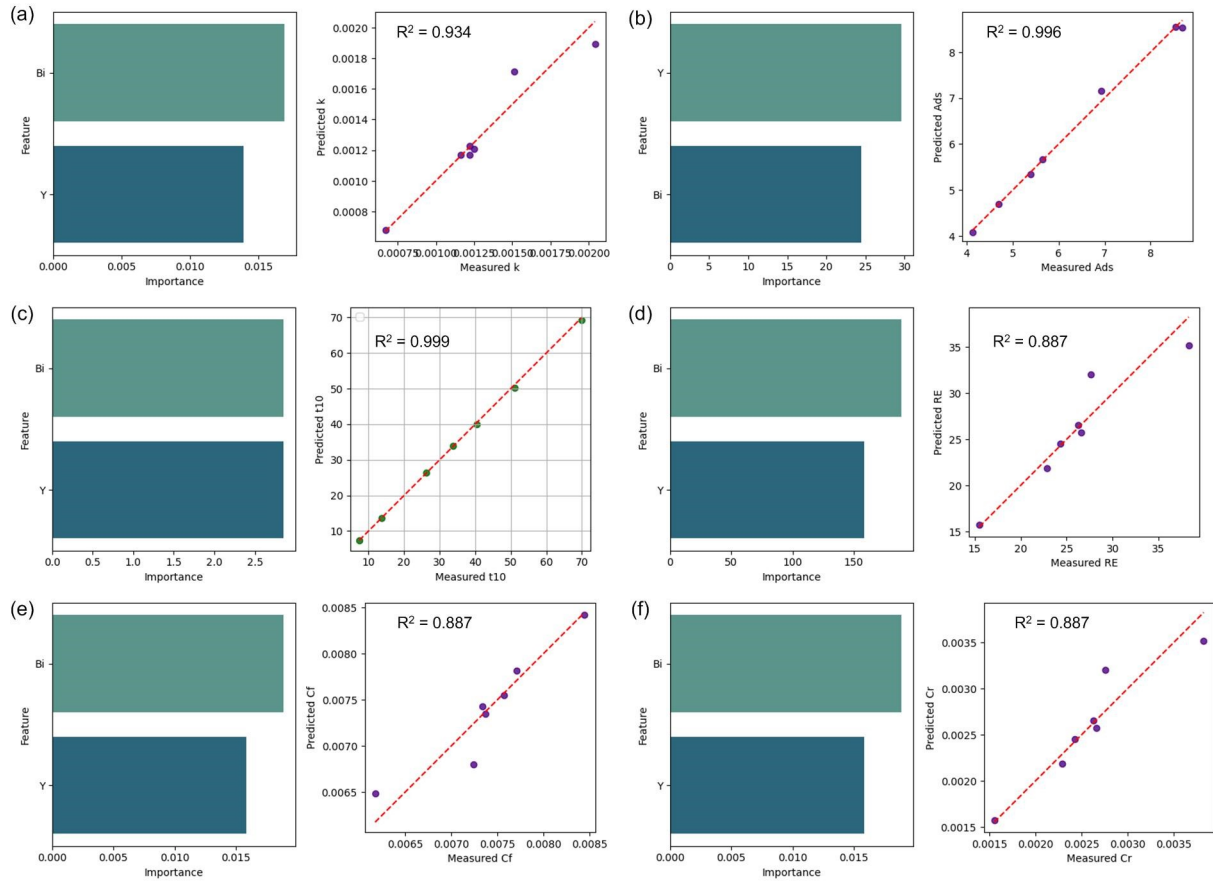

**Figure S4.** Variable importance, and plots of predicted and measured values for k (a) - polynomial equation, Ads (b) – polynomial equation,  $t_{10}$  (c) – GPR, RE (d) – polynomial equation,  $C_f$  (e) - polynomial equation,  $C_r$  (f) - polynomial equation. Results for the best models are shown.
